# Supplementary material for: Randomized Phase 2 Clinical Trial of Olaratumab in Combination with Gemcitabine and Docetaxel in Advanced Soft Tissue Sarcomas
Source: MDPI journal article supplement (doi:10.3390/cancers15194871), 2023-10-06
Supplement: s1 [file s1]

## Supplementary Materials

**Supplementary Table S1. Overall survival by histological tumor type (LMS and non-LMS).**

| Arm                     | Olaratumab-naïve                       |                                  |                                                     | Olaratumab-pretreated                  |                                  |                                                     |
|-------------------------|----------------------------------------|----------------------------------|-----------------------------------------------------|----------------------------------------|----------------------------------|-----------------------------------------------------|
|                         | Investigational arm<br>(O+G+D)<br>N=81 | Control arm<br>(PBO+G+D)<br>N=86 |                                                     | Investigational arm<br>(O+G+D)<br>N=46 | Control arm<br>(PBO+G+D)<br>N=43 |                                                     |
| Histological tumor type | Median <sup>a</sup><br>(95% CI)        |                                  | HR <sup>b</sup> (95% CI)<br>[P-value <sup>c</sup> ] | Median <sup>a</sup><br>(95% CI)        |                                  | HR <sup>b</sup> (95% CI)<br>[P-value <sup>c</sup> ] |
| <b>LMS</b>              | 17.3 months<br>(15.3–34.8)             | 22.0 months<br>(12.9–28.5)       | 0.82 (0.46–1.45)<br>[0.48]                          | 31.7 months<br>(17.9–)                 | 20.3 months<br>(15.8–27.1)       | 0.50 (0.20–1.23)<br>[0.12]                          |
| <b>Median OS</b>        |                                        |                                  |                                                     |                                        |                                  |                                                     |
| <b>Non-LMS</b>          | 16.2 months<br>(12.2–24.1)             | 15.1 months<br>(10.6–21.6)       | 0.96 (0.58–1.59)<br>[0.86]                          | 18.8 months<br>(6.6–)                  | 11.2 months<br>(6.8–20.2)        | 0.75 (0.37, 1.50)<br>[0.41]                         |

Abbreviations: CI = confidence interval; D = Docetaxel; G = Gemcitabine; HR = Hazard ratio; N = number of patients in population; n = number of patients in the specified category; O = Olaratumab; OS = Overall Survival. <sup>a</sup> Estimated using the Kaplan-Meier method. <sup>b</sup> Hazard ratio (Treatment A vs Treatment B) and 95% CI (Wald) were estimated from unstratified Cox model. <sup>c</sup> Two-sided p-value from unstratified log-rank test

**Supplementary Table S2. Overall survival and progression-free survival by histological tumor type (liposarcoma, leiomyosarcoma, undifferentiated pleomorphic sarcoma and other).**

|                                             | Overall Survival <sup>a</sup>  |                          |                                                     | Progression-free Survival <sup>a</sup> |                          |                                                     |
|---------------------------------------------|--------------------------------|--------------------------|-----------------------------------------------------|----------------------------------------|--------------------------|-----------------------------------------------------|
| Histological tumor type                     | Investigational arm<br>(O+G+D) | Control arm<br>(PBO+G+D) |                                                     | Investigational arm<br>(O+G+D)         | Control arm<br>(PBO+G+D) |                                                     |
|                                             | Median <sup>b</sup>            |                          | HR <sup>c</sup> (95% CI)<br>[P-value <sup>c</sup> ] | Median <sup>b</sup>                    |                          | HR <sup>c</sup> (95% CI)<br>[P-value <sup>d</sup> ] |
| <b>Liposarcoma</b>                          | N=16<br>14.6 months            | N=14<br>NE               | 1.63 (0.59–4.48)<br>[0.324]                         | N=16<br>8.1 months                     | N=14<br>4.4 months       | 1.04 (0.44–2.47)<br>[0.923]                         |
| <b>Leiomyosarcoma</b>                       | N=58<br>27.0 months            | N=58<br>21.1 months      | 0.73 (0.45–1.17)<br>[0.188]                         | N=58<br>8.2 months                     | N=58<br>5.8 months       | 0.70 (0.44–1.12)<br>[0.137]                         |
| <b>Undifferentiated Pleomorphic Sarcoma</b> | N=10<br>20.4 months            | N=13<br>15.9 months      | 0.56 (0.19–1.64)<br>[0.284]                         | N=10<br>5.5 months                     | N=13<br>5.9 months       | 0.64 (0.20–2.06)<br>[0.452]                         |
| <b>Other</b>                                | N=43<br>16.2 months            | N=44<br>11.1 months      | 0.83 (0.50–1.37)<br>[0.455]                         | N=43<br>4.4 months                     | N=44<br>4.0 months       | 0.73 (0.46–1.17)<br>[0.192]                         |

Abbreviations: CI = confidence interval; D = Docetaxel; G = Gemcitabine; HR = Hazard ratio; N = number of patients in population; NE = not estimable; O = Olaratumab; OS = Overall Survival. <sup>a</sup> O-naïve and O-pretreated cohorts were pooled for this analysis. <sup>b</sup> Estimated using the Kaplan-Meier method. <sup>c</sup> Hazard ratio (Investigational vs Control arm) and 95% CI (Wald) were estimated from unstratified Cox model. <sup>d</sup> Two-sided p-value from unstratified log-rank test

**Supplementary Table S3. Overall survival and progression-free survival by treatment and PDGFR status (positive/negative) in the total soft tissue sarcoma population.**

|                           |                  |              | Overall Survival               |                          |                                                     | Progression-free Survival      |                          |                                                     |
|---------------------------|------------------|--------------|--------------------------------|--------------------------|-----------------------------------------------------|--------------------------------|--------------------------|-----------------------------------------------------|
| Arm                       |                  |              | Investigational arm<br>(O+G+D) | Control arm<br>(PBO+G+D) |                                                     | Investigational arm<br>(O+G+D) | Control arm<br>(PBO+G+D) |                                                     |
| PDGFR status <sup>a</sup> |                  |              | Median <sup>b</sup>            |                          | HR <sup>c</sup> (95% CI)<br>[P-value <sup>d</sup> ] | Median <sup>b</sup>            |                          | HR <sup>c</sup> (95% CI)<br>[P-value <sup>d</sup> ] |
| Olaratumab-naïve          | PDGFR-α<br>N=155 | (-)<br>n=62  | 16.8 months                    | 19.7 months              | 0.96 (0.5–1.84)<br>[0.905]                          | 8.2 months                     | 6.9 months               | 0.71 (0.39–1.3)<br>[0.273]                          |
|                           |                  | (+)<br>n=93  | 16.2 months                    | 15.8 months              | 0.97 (0.6–1.59)<br>[0.916]                          | 7.0 months                     | 4.0 months               | 0.79 (0.49–1.27)<br>[0.331]                         |
|                           | PDGFR-β<br>N=154 | (-)<br>n=45  | 16.8 months                    | 19.9 months              | 0.68 (0.33–1.41)<br>[0.301]                         | 6.9 months                     | 4.2 months               | 0.85 (0.43–1.68)<br>[0.649]                         |
|                           |                  | (+)<br>n=109 | 16.2 months                    | 18.0 months              | 1.07 (0.67–1.71)<br>[0.781]                         | 7.6 months                     | 4.4 months               | 0.72 (0.46–1.13)<br>[0.157]                         |
| Olaratumab-pretreated     | PDGFR-α<br>N=74  | (-)<br>n=29  | 19.6 months                    | 20.2 months              | 0.87 (0.34–2.21)<br>[0.766]                         | 5.2 months                     | 8.0 months               | 1.65 (0.6–4.53)<br>[0.332]                          |
|                           |                  | (+)<br>n=45  | 19.3 months                    | 13.1 months              | 0.60 (0.28–1.28)<br>[0.185]                         | 5.5 months                     | 2.8 months               | 0.72 (0.37–1.4)<br>[0.333]                          |
|                           | PDGFR-β<br>N=73  | (-)<br>n=20  | 19.6 months                    | 19.2 months              | 0.88 (0.29–2.65)<br>[0.824]                         | 5.2 months                     | 4.1 months               | 1.04 (0.35–3.11)<br>[0.938]                         |
|                           |                  | (+)<br>n=58  | 19.8 months                    | 19.1 months              | 0.72 (0.36–1.44)<br>[0.348]                         | 5.5 months                     | 5.4 months               | 0.91 (0.48–1.72)<br>[0.767]                         |

Abbreviations: + = positive; – = negative; CI = confidence interval; D = Docetaxel; G = Gemcitabine; HR = Hazard ratio; N = number of patients in population; n = number of patients in the specified category; O = Olaratumab; OS = Overall Survival. <sup>a</sup> PDGFR-α tumor status was determined with a rabbit monoclonal antibody (Cell Signaling Technology clone D13C6) specific for PDGFR-α without cross-reactivity to PDGFR-β. PDGFR-β tumor status was determined with a mouse monoclonal antibody (Cell Signaling Technology clone 2B3) proven to be specific for PDGFR-β with no

cross-reactivity for PDGFR- $\alpha$ . The status for PDGFR- $\alpha$  and PDGFR- $\beta$  was provided as a dichotomous variable with “positive” and “negative” expression, where a “positive” result showed  $\geq 10\%$  of the tumor as demonstrating at least weak but specific membranous expression (1+ on a 0, 1+, 2+, 3+ scale of staining intensity). “Negative” corresponded to expression that did not meet these criteria. <sup>b</sup> Estimated using the Kaplan-Meier method. <sup>c</sup> Hazard ratio (Investigational vs Control arm) and 95% CI (Wald) were estimated from unstratified Cox model. <sup>d</sup> Two-sided *P*-value from unstratified log-rank test

**Supplementary Table S4. Summary of patient-reported outcomes (QLQ-C30 global health status/QoL subscale and mBPI-sf scores) for the O-naïve and O-pretreated cohorts.**

| Arm                                              | Olaratumab-naïve                       |                                  |                                    | Olaratumab-pretreated                  |                                  |                                    |
|--------------------------------------------------|----------------------------------------|----------------------------------|------------------------------------|----------------------------------------|----------------------------------|------------------------------------|
|                                                  | Investigational arm<br>(O+G+D)<br>N=81 | Control arm<br>(PBO+G+D)<br>N=86 |                                    | Investigational arm<br>(O+G+D)<br>N=46 | Control arm<br>(PBO+G+D)<br>N=43 |                                    |
| Patient-reported outcomes                        |                                        |                                  | HR (95% CI)<br>[ <i>P</i> -value*] |                                        |                                  | HR (95% CI)<br>[ <i>P</i> -value*] |
| <b>QLQ-C30 global health status/QoL subscale</b> | <b>n=81</b>                            | <b>n=86</b>                      |                                    | <b>n=45</b>                            | <b>n=43</b>                      |                                    |
| Mean baseline scores (SD)                        | 68.5 (19.7)                            | 68.7 (23.1)                      |                                    | 72.6 (19.7)                            | 69.8 (21.4)                      |                                    |
| Median time to worsening, months (95% CI)        | 1.1 (0.8–1.5)                          | 1.8 (0.8–2.8)                    | 1.21 (0.82–1.79)<br>[0.32]         | 1 (0.8–3.9)                            | 1.5 (0.8–2.9)                    | 1.11 (0.63–1.95)<br>[0.79]         |
| <b>mBPI-sf</b>                                   | <b>n=67</b>                            | <b>n=71</b>                      |                                    | <b>n=41</b>                            | <b>n=34</b>                      |                                    |
| Mean baseline scores for worst pain (SD)         | 3.0 (2.6)                              | 2.5 (2.8)                        |                                    | 2.4 (2.7)                              | 1.8 (2.5)                        |                                    |
| Median time to first worsening, months (95% CI)  | 3.6 (2.7–8.6)                          | 2.3 (1.4–6.5)                    | [0.07]                             | 3.2 (1.4–7.6)                          | 2.2 (0.76–3.02)                  | [0.23]                             |

Abbreviations: CI = confidence interval; D = Docetaxel; G = Gemcitabine; HR = Hazard ratio; mBPI-sf = modified Brief Pain Inventory-short form; N = number of patients in population; n = number of patients in the specified category; QLQ-C30 = the European Organization for Research and Treatment of Cancer (EORTC) quality of life questionnaire; QoL = quality of life; O = Olaratumab; OS = Overall Survival; SD = standard deviation. \**P*-value was analyzed per stratified log-rank test.

## CONSORT 2010 Flow Diagram

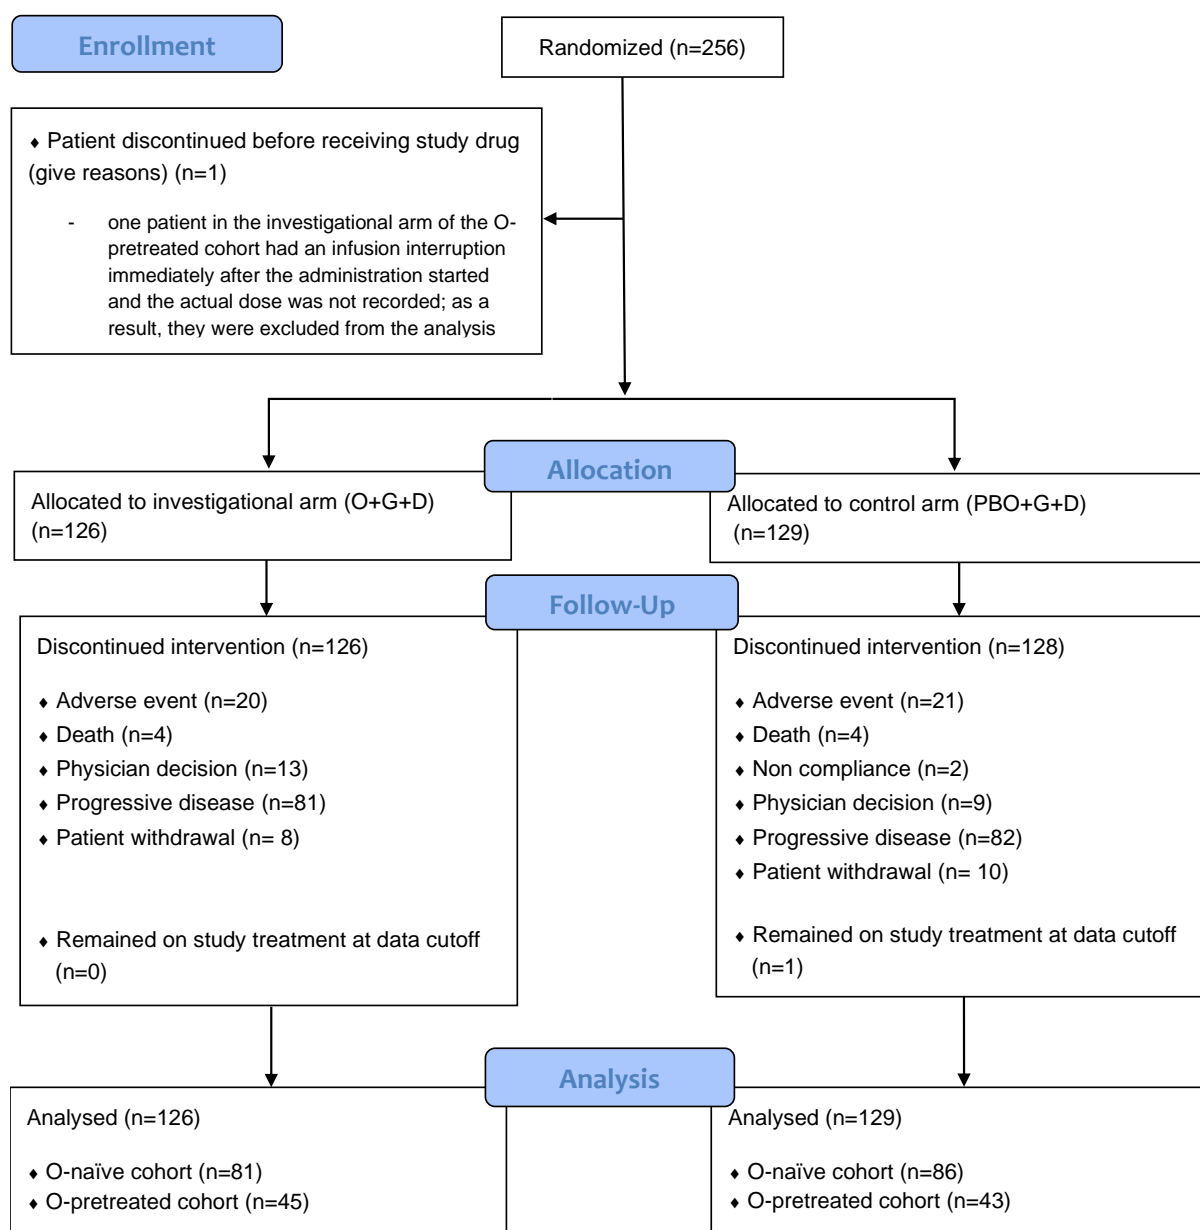

**Supplementary Figure S1. CONSORT Flow Diagram of the ANNOUNCE 2 Trial.**

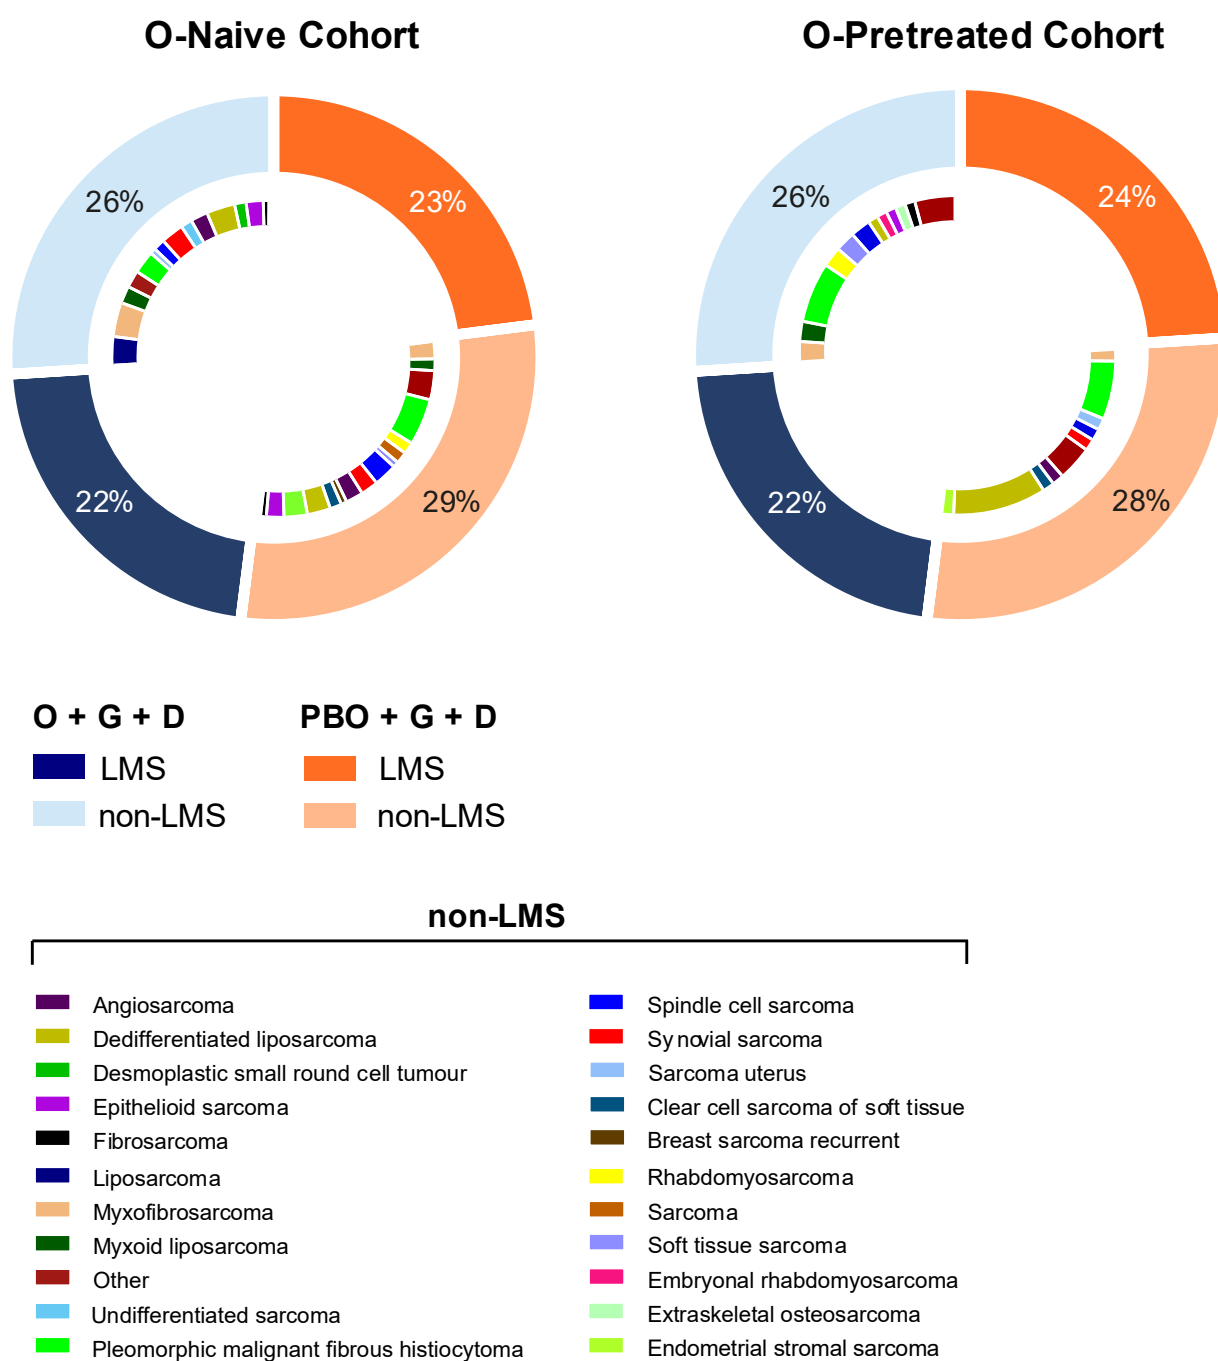

**Supplementary Figure S2. Soft Tissue Sarcoma Subtypes in the O-naïve and O-pretreated cohorts.**

A

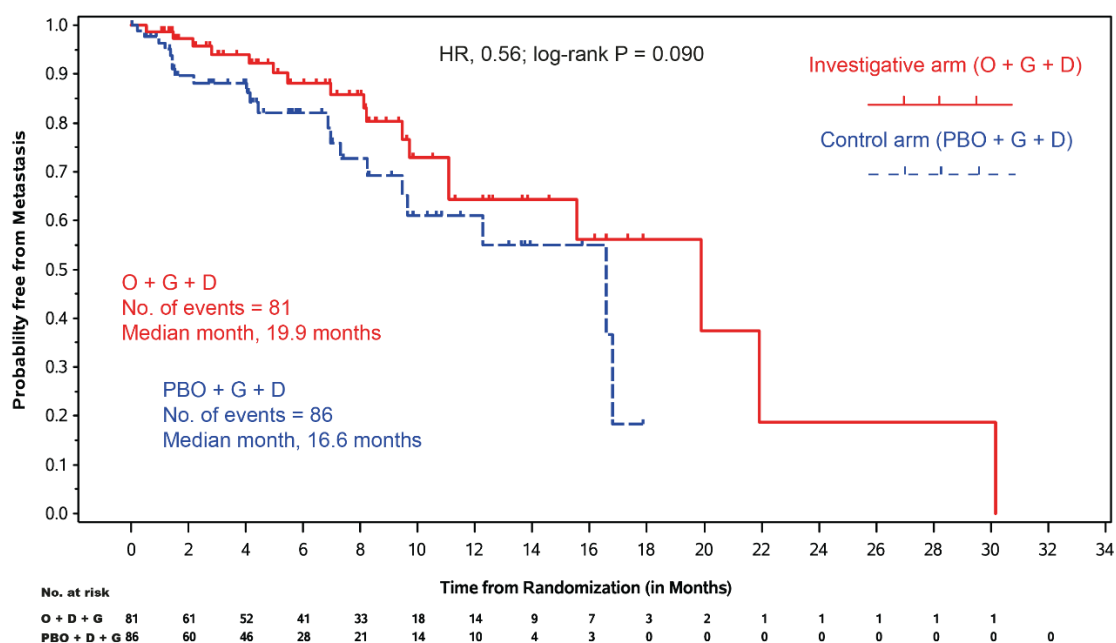

B

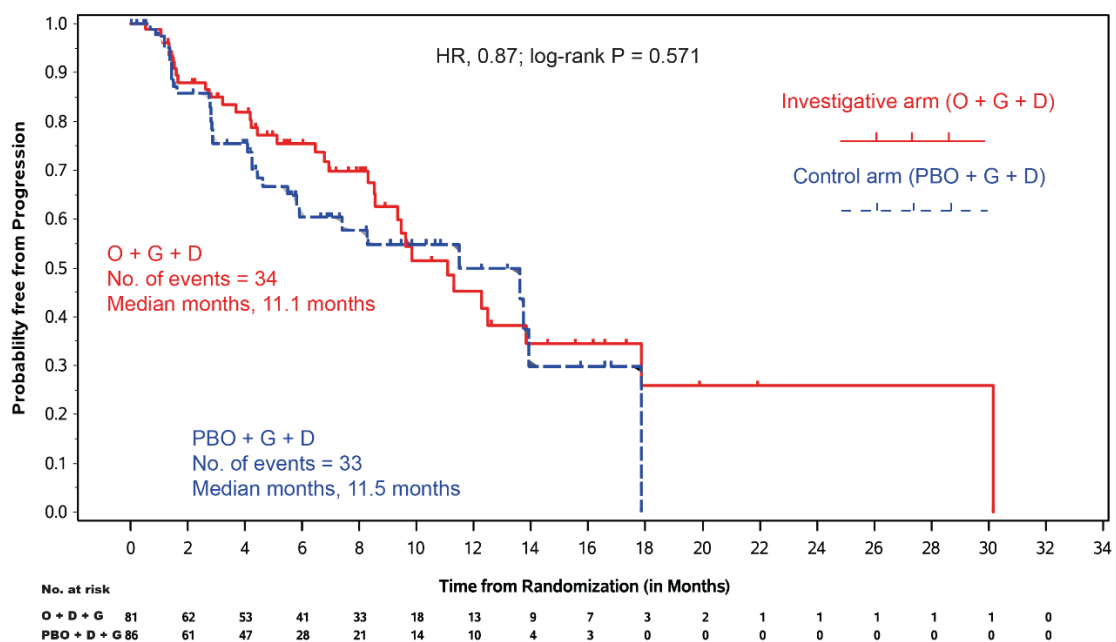

**Supplementary Figure S3. KM Plots of time to (A) any metastasis and (B) any progression based solely on increased sum of target lesions, for the O-naïve cohort (ITT population).**

**Abbreviations:** D = Docetaxel; G = Gemcitabine; HR = Hazard ratio; ITT = intent to treat population; KM = Kaplan-Meier; No. = number; O = Olaratumab; PBO = placebo
